15 **ABSTRACT**

16 Accumulating evidence across species indicates that brain oscillations are superimposed  
17 upon an aperiodic  $1/f$  - like power spectrum. Maturational changes in neuronal oscillations  
18 have not been assessed in tandem with this underlying aperiodic spectrum. The current study  
19 uncovers co-maturation of the aperiodic component alongside the periodic components  
20 (oscillations) in spontaneous magnetoencephalography (MEG) data. Beamformer-  
21 reconstructed MEG time-series allowed a direct comparison of power in the source domain  
22 between 24 children ( $8.0 \pm 2.5$  years, 17 males) and 24 adults ( $40.6 \pm 17.4$  years, 16 males).  
23 Our results suggest that the redistribution of oscillatory power from lower to higher frequencies  
24 that is observed in childhood does not hold once the age-related changes in the aperiodic  
25 signal are controlled for. When estimating both the periodic and aperiodic components, we  
26 found that power increases with age in the beta band only, and that the  $1/f$  signal is flattened  
27 in adults compared to children. These results suggest a pattern of co-maturing beta oscillatory  
28 power with the aperiodic  $1/f$  signal in typical childhood development.

## 29 INTRODUCTION

### 30 Neuronal Oscillations Characteristic of Childhood Brain Maturation

31 Neuronal oscillatory power undergoes profound developmental changes throughout childhood  
32 (Gomez et al., 2017; Rodriguez-Martinez et al., 2017). These developmental changes in  
33 neuronal oscillations are often assessed noninvasively using electrophysiological brain  
34 recordings such as magneto-/electro-encephalography (MEG/EEG). Commonly, a Fourier  
35 analysis is used to compute the power spectral density (PSD) in fixed frequency bands,  
36 including delta (1-4 Hz), theta (4-8 Hz), alpha (8-13 Hz), beta (13-30 Hz), and gamma (30-80  
37 Hz; Mackay, 1997; note that different studies may differ slightly in establishing the boundaries  
38 between frequency bands). There are age-related decreases in total power, which is estimated  
39 across a broad frequency range (Gasser et al., 1988; Schafer et al., 2014; Gomez et al., 2017;  
40 Rodriguez-Martinez et al., 2017), as well as age-related decreases in absolute power in each  
41 of the narrowband frequencies (Gasser et al., 1988; Boord et al., 2007). Studies also report a  
42 low-to-high redistribution of relative power (i.e., where power is estimated in any given band  
43 in relation to the total power across all frequencies); more specifically, relative power  
44 decreases in the delta and theta bands and increases in the alpha, beta and gamma bands  
45 (Puligheddu et al., 2005; Gomez et al., 2013; Schafer et al., 2014). In addition, there is an  
46 increase during childhood in the peak frequency of alpha oscillations, which typically reach a  
47 peak frequency of ~10 Hz around the primary/elementary school years (Marcuse et al., 2008;  
48 Boersma et al., 2011; Cragg et al., 2011; Smit, Boomsma, et al., 2012; Miskovic et al., 2015;  
49 Gomez et al., 2017; Rodriguez-Martinez et al., 2017).

50 Power in each narrow frequency band has been associated with different cognitive functions.  
51 The alpha rhythm (Markand, 1990) has been prominently associated with inhibition of visual  
52 attention (Jensen and Mazaheri, 2010; Clayton et al., 2017; Voytek et al., 2017). In addition,  
53 the increase of alpha peak frequency with age has been considered a biomarker for cognitive

54 development (Marcuse et al., 2008; Boersma et al., 2011; Cragg et al., 2011; Smit, Boomsma,  
55 et al., 2012; Miskovic et al., 2015; Gomez et al., 2017; Rodriguez-Martinez et al., 2017), which  
56 suggests that the perception of visual stimuli would also improve with age (Thut et al., 2012).  
57 In the sensory motor cortex, mu, which is analogous to the alpha band (Mackay, 1997), and  
58 beta oscillations have been found to increase when cortical motor areas are disengaged (Ritter  
59 et al., 2009; Jenkinson and Brown, 2011). Our recent longitudinal MEG study of motor  
60 development in children demonstrated linear increases in amplitude and mean frequency in  
61 movement-evoked mu and beta oscillations (Johnson et al., 2019). In studies of  
62 developmental resting-state neuronal activity (i.e., in the absence of any specific cognitive  
63 event), there are also reports of age-related increases in mu power from infancy to age 5  
64 (Berchicci et al., 2011) and age-related increases in beta power between age 9-14 and 20-42  
65 (Heinrichs-Graham et al., 2018). Delta power has been correlated with different stages of  
66 sleep (Amzica and Steriade, 1998), and theta activity has been shown to relate to executive  
67 attention and working memory (Wang et al., 2005). Developmental trends in delta and theta  
68 power are less clear, with some studies reporting profound decreases during childhood  
69 (Schafer et al., 2014; Gomez et al., 2017) and others reporting no changes between 9 and 11  
70 years, followed by decreases into early adulthood (Campbell and Feinberg, 2009). There is  
71 evidence of increased gamma activity in the initiation and cessation of movement (Gaetz et  
72 al., 2010; Burianova et al., 2013; Cheyne and Ferrari, 2013; Marstaller et al., 2014; Sowman  
73 et al., 2014). Gamma activity can be adult-like as early as 3 years of age in motor tasks  
74 (Johnson et al., 2019), and resting state gamma activity across the first 3 years of life is  
75 predictive of later development of language and cognitive skills (Benasich et al., 2008). Based  
76 on the previous literature, it is clear that a precise characterisation of developmental changes  
77 in neuronal oscillatory power is critical for our mechanistic understanding of the maturation of  
78 cognitive functions during childhood.

## 79 **Outstanding Questions**

80 Spectral analysis of resting-state MEG/EEG recordings has proven to be a powerful tool for  
81 assessing age-related power changes. However, nearly all previous resting-state studies have  
82 used the five canonical frequency bands to estimate developmental changes in power. These  
83 studies, therefore, are susceptible to methodological challenges. For example, examining  
84 power in pre-defined bands can conflate power changes with other parameters, such as  
85 oscillation centre frequency and bandwidth (Haller et al., 2018). An example is the increase in  
86 alpha peak frequency with age, which is considered to be one of the most important  
87 electrophysiological hallmarks of brain development (Valdés et al., 1990). Following historical  
88 tradition, nearly every study to date has defined the peak frequency as the frequency with the  
89 highest amplitude within the range of the canonical alpha band. Under this constraint, it is  
90 impossible to determine whether or not changes in the peak frequency may in fact reflect shifts  
91 of the peak frequency outside the canonical alpha band. Similarly, group-level estimates of  
92 power in one band may leak into the estimates of power in adjacent bands, given the variability  
93 in oscillation centre frequency across individuals (Haegens et al., 2014; Samaha and Postle,  
94 2015) and age (Rodriguez-Martinez et al., 2017). But perhaps most importantly, the  
95 narrowband estimates of oscillatory activity may be affected by aperiodic components in the  
96 signal. Brain activity at many spatiotemporal scales, ranging from neuronal membrane  
97 potentials to MEG/EEG signals, exhibits an aperiodic background signal that co-exists with  
98 neuronal oscillations (He, 2014). This aperiodic signal follows a power-law function:  $P \propto 1/f^x$ .  
99 Thus, power  $P$  is inversely proportional to frequency  $f$  with a power-law exponent of  $x$ , which  
100 is equivalent to the slope of the power spectrum when plotted in the log-log space. The  
101 aperiodic  $1/f$  signal is not only prevalent in the nervous system, but it is a ubiquitous feature  
102 of a wide variety of time-varying real-world systems, including the flow of the river Nile and the  
103 luminosity of stars (Bak et al., 1987). Historically, the aperiodic  $1/f$  signal has not been as  
104 well investigated as periodic (oscillatory) brain activity, resulting in a lack of consensus on how

105 to measure it, what it may reflect, and what might be its physiological generators. Nonetheless,  
106 the recent electrophysiological literature has started to elucidate the functional significance of  
107 the  $1/f$  signal in human cognition and behaviour. For instance, this signal has been found to  
108 vary systematically with age (Voytek et al., 2015), and to change with task demands (He et  
109 al., 2010) that can co-vary with behavioural performance (Podvalny et al., 2015). Moreover,  
110 recent simulations, as well as empirical data from rats and macaques, indicate that neuronal  
111 excitation and inhibition in cortical circuits can be inferred from the slope of the invasively-  
112 recorded electrophysiological power spectrum (Gao et al., 2017). This further emphasises the  
113 importance of quantifying the  $1/f$  signal and its contributions to human cognition (Voytek and  
114 Knight, 2015).

115 Related to this, standard analytic approaches, which estimate power in narrow frequency  
116 bands, fail to examine whether an oscillation – a rhythmic component that peaks at a particular  
117 frequency – is truly present in the power spectrum. The power that is assessed within a pre-  
118 defined frequency range of the electrophysiological power spectrum is most likely a mixture of  
119 both oscillatory and aperiodic  $1/f$  components. It is imperative to disentangle age-related  
120 changes in the narrowband oscillations from those in the broadband aperiodic  $1/f$  signal.  
121 Although these signals are inter-related, they are likely to represent distinct underlying neural  
122 mechanisms (Haller et al., 2018).

### 123 **Current Study: Aims and Hypotheses**

124 To overcome the limitations of previous studies that used narrowband power analyses, the  
125 present study used advanced analysis techniques (Haller et al., 2018) to investigate, and to  
126 disentangle, age-related effects in the aperiodic  $1/f$  and the oscillatory components of brain  
127 activity. For this, we used a paediatric whole-head MEG scanner (Johnson et al., 2010) to  
128 collect resting-state electrophysiological signals from children ranging in age from 4 to 12  
129 years, as well as a conventional MEG scanner to obtain the same signals from adults.  
130 Importantly, source waveforms were computed using an atlas-based beamforming approach

131 for power spectra analyses (Hillebrand et al., 2012; Hillebrand et al., 2016), which allowed for  
132 direct comparison of MEG data acquired from the two systems (He et al., 2019).

133 We first analysed neuronal power in pre-defined frequency bands using standard methods, to  
134 permit direct comparisons of our results with those from previous studies. In line with the  
135 previous literature (Gasser et al., 1988; Puligheddu et al., 2005; Marcuse et al., 2008; Boersma  
136 et al., 2011; Cragg et al., 2011; Smit, Boersma, et al., 2012; Gomez et al., 2013; Schafer et  
137 al., 2014; Miskovic et al., 2015; Gomez et al., 2017; Rodriguez-Martinez et al., 2017), we  
138 hypothesised that, in contrast to children, adults would show decreased low-frequency power,  
139 increased high-frequency power, and an increased alpha peak frequency.

140 Subsequently, we used an automatic parameterising algorithm (Haller et al., 2018) that  
141 efficiently disentangles the two features - the *slope* and the *offset* – that characterise the  $1/f$   
142 signal, and the three features – the *centre frequency*, *power* and *bandwidth* – that characterise  
143 the oscillatory components. Since the automatic parameterising algorithm does not impose  
144 band boundaries, this method allows for the assessment of group and individual differences  
145 in the *centre frequency*, *power* and *bandwidth* of the oscillations, both in the broadband  
146 spectra and in pre-defined narrow bands. With regard to possible age-associated differences  
147 in  $1/f$  signal, there exists only one developmental fMRI/EEG study so far, which showed that  
148 the  $1/f$  slope was significantly flatter in 17 healthy adults compared to 21 full-term newborns  
149 (Fransson et al., 2013). Based on the limited developmental MEG/EEG evidence regarding  
150 the  $1/f$  signal, we hypothesised that differences in the  $1/f$  signal may account to a large  
151 extent for observed age-related power differences between children and adults, and that  
152 canonical frequency band analyses may confound some band specific power changes with  
153  $1/f$  signal shifts. In particular, we predicted that the  $1/f$  slope would be flatter, and the offset  
154 would be smaller in adults as compared to children (Fransson et al., 2013).

## 155 **METHODS**

### 156 **Participants and Ethics Statement**

157 This study included 52 human participants (28 children and 24 adults), namely healthy controls  
158 that had been recruited in a larg project on stuttering. Data from 4 children were excluded from  
159 the analysis due to excessive head movement ( $> 5$  mm), incidental system noise or signs of  
160 drowsiness throughout the recording. Drowsiness was monitored online through a video-  
161 camera so that any affected data would be removed from further analysis. Child participants  
162 were accompanied by an experienced researcher who sat with them during the whole session  
163 to make sure they remained comfortable, and who monitored and encouraged their  
164 compliance. The final sample consisted of 24 children ( $8.0 \pm 2.5$  years, 17 males) and 24  
165 adults ( $40.6 \pm 17.4$  years, 16 males).

166 Written informed consent was obtained from the adult participants and from the  
167 parents/guardians of the children prior to the experiment. No participant reported personal or  
168 family history of neurological disease or psychological impairment and none were taking  
169 medication that could affect MEG recordings at the time of participation. All participants were  
170 remunerated \$AUD 40 for their participation. The experimental procedures were approved by  
171 the Human Participants Ethics Committee at Macquarie University.

### 172 **MEG Data Acquisition**

173 Resting-state MEG data of 300 seconds were acquired for child and adult participants using  
174 two separate whole-head gradiometer MEG systems. Child data were acquired using a  
175 paediatric 125-channel whole-head gradiometer MEG system (Model PQ1064R-N2m,  
176 Kanazawa Institute of Technology/KIT, Kanazawa, Japan). Adult data were acquired using a  
177 160-channel whole-head gradiometer MEG system (Model PQ1160RN2, KIT, Kanazawa,  
178 Japan). Use of the paediatric MEG system to overcome critical limiting factors for MEG  
179 experimentation on children below the ages of five to six years (Irimia et al., 2014), including



180 a much smaller head size and overall structure in children (the smaller crown to shoulder  
181 distance prevents the full insertion of the head into the adult helmet), has been demonstrated  
182 previously (Sowman et al., 2014; He, Brock, et al., 2015; He, Garrido, et al., 2015; Etchell et  
183 al., 2016).

184 The gradiometers of both systems have 50 mm baseline and 15.5 mm diameter coils  
185 positioned in a glass fibre reinforced plastic cryostat for measurement of the normal  
186 component of the magnetic field from the human brain (Kado et al., 1999). In both systems,  
187 neighbouring channels are 38 mm apart and 20 mm from the outer dewar surface. These  
188 factors ensure that the signals obtained by the two MEG systems are equivalent. The 125-  
189 channel dewar was designed to fit a maximum head circumference of 53.4 cm,  
190 accommodating more than 90% of heads of 5-year-olds (see Johnson et al., 2010 for details).  
191 Both systems were situated within the same magnetically shielded room within the KIT-  
192 Macquarie Brain Research Laboratory ([https://www.mq.edu.au/research/research-centres-](https://www.mq.edu.au/research/research-centres-groups-and-facilities/healthy-people/facilities/meg)  
193 [groups-and-facilities/healthy-people/facilities/meg](https://www.mq.edu.au/research/research-centres-groups-and-facilities/healthy-people/facilities/meg)), and therefore environmental noise was  
194 comparable.

195 During MEG data acquisition, participants were asked to remain relaxed, awake and with their  
196 eyes fixed on a white cross at the centre of a black 36 cm (width) x 24 cm (length) rectangular  
197 image with 4 x 4 degrees of visual angle. Visual display was presented on a back-projected  
198 screen mounted approximately 140 cm above the participant using video projectors situated  
199 outside the magnetically shielded room (child MEG projector: Sharp Notevision Model PG10S,  
200 Osaka, Japan; Adult MEG projector: InFocus Model IN5108, Portland, USA). An overview of  
201 the child-friendly experimental protocol can be found in the video article (Rapaport et al., 2019).

## 202 **MEG Data Processing**

203 An overview of the processing pipeline is illustrated in Figure 1. MEG data were acquired at a  
204 sampling frequency of 1000 Hz, using a hardware bandpass filter of 0.03-200 Hz. The

205 continuous raw MEG data were filtered off-line from 0.5 to 100 Hz using bi-directional IIR  
206 Butterworth filters with DC removal and segmented into epochs of 4096 samples (= 4.096  
207 seconds). The data were visually inspected by WH, and epochs that contained oculographic,  
208 myographic, and system/environmental artefacts (e.g., squid jumps) were removed. The first  
209 and last epochs were also excluded from the analysis. A mean of  $23.8 \pm 3.02$  artefact-free  
210 epochs of 4.096 s data in children (15-28 epochs) and  $40.0 \pm 0.02$  artefact-free epochs in  
211 adults (39-40 epochs) were selected for subsequent source modelling. There were age-  
212 related differences in the number of clean trials between children and adults ( $t(46) = 26.31, p$   
213  $< 0.01$ ; two-sample t-test using the `ttest2` function in MATLAB, version R2017b), as expected  
214 and was inevitable due to the fact that more trials were removed from younger participants  
215 because of movement. However, it has been shown in previous simulations that beamformer  
216 performance plateaus before the lower limit of ~80 seconds of data that was used for our  
217 analysis (20 epochs of 4.096 seconds; Brookes et al., 2008).

218 MEG sensor data were then projected onto a parcellated cortical surface using an atlas-based  
219 beamforming approach (Hillebrand et al., 2012; Hillebrand et al., 2016), providing source  
220 activities at each centroid of the automated anatomical labelling (AAL) atlas (Tzourio-Mazoyer  
221 et al., 2002). Firstly, the geometry of each participant's scalp was reconstructed from a  
222 "surrogate" MRI, where the Montreal Neurological Institute (MNI) template T1 structural brain  
223 image was warped to each participant's digitized head shape with an iterative closest point  
224 algorithm implemented in *BrainWave* (Cheyne et al., 2014). Secondly, a multi-sphere volume  
225 conductor model was calculated using the outline of the scalp from this co-registered data in  
226 MRIVIEWER of the CTF MEG5 software (VSM MedTech Systems Inc., Coquitlam BC, Canada;  
227 Version 5.0.2). Thirdly, the broadband (0.5-48 Hz) data covariance matrix was calculated from  
228 all selected epochs, and a unity noise covariance was used. Lastly, the data covariance, the  
229 unity noise covariance, together with an equivalent current dipole source model and the multi-  
230 sphere volume conductor model, were combined to reconstruct beamformer weights for the  
231 parcels' centroids using Synthetic Aperture Magnetometry (SAM, Robinson, 1999).

232 Subsequently, the broadband MEG sensor data were projected through the normalised  
233 beamformer weights in order to obtain traces of neuronal activity in the cortical space (Cheyne  
234 et al., 2007).

235 To counteract trial imbalance between groups, we chose for each individual the first 15  
236 artefact-free epochs from each of the 80 AAL source regions of interest (80 Regions of  
237 Interest/ROIs; 78 cortical and bilateral hippocampal) for the subsequent estimation of power  
238 spectral density.

**A. Resting State MEG Recording**

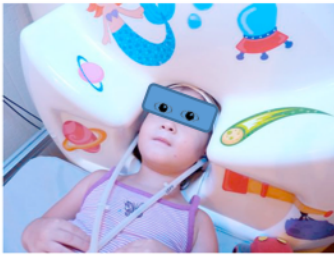

**B. Bandpass Filtered Data**

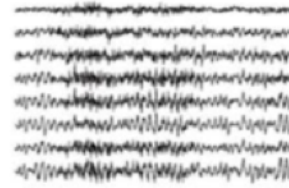

**D. Head Shape and Template MRI warping**

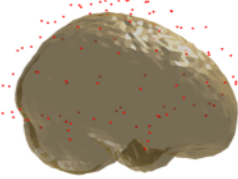

**C. MEG and Head Shape Co-registration**

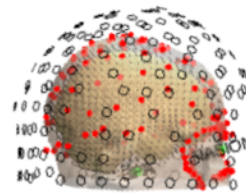

**E. Beamforming onto Parcellated Brain**

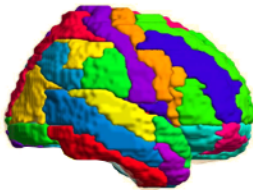

**F. Source Data per Brain Area**

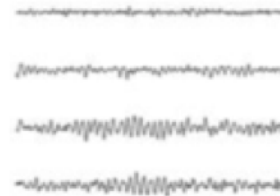

239

240 **Figure 1. Schematic overview of the processing pipeline. The eyes-open resting**  
241 **state MEG were recorded (A) and bandpass filtered (B) before being co-**  
242 **registered to individual head shape (C) and template MRI (D). Following this,**  
243 **data were epoched and beamformed to parcels of the AAL atlas (E). Power**  
244 **spectral density was then estimated from individual cortical sources by Welch's**  
245 **method (F).**

## 246 **Spectral Analysis**

### 247 **Conventional Analysis in *a priori* Defined Frequency Bands**

248 Power spectral density (PSD) was estimated for each participant, ROI and artefact-free  
249 epochs separately using Welch's method (Welch, 1967) implemented in MATLAB 2017b, with  
250 50% overlap and a Hamming window of 3s (resulting in a spectral resolution of 0.24 Hz). A  
251 single PSD for each participant was obtained by averaging the PSDs across all epochs and  
252 ROIs.

253 A conventional spectral analysis was carried out by calculating the absolute power from the  
254 raw power spectrum in five canonical frequency bands (delta: 1–4 Hz, theta: 4–8 Hz, alpha:  
255 8–13 Hz, beta: 13–30 Hz, and low gamma: 30–48 Hz). The frequency at which each participant  
256 reached the peak amplitude was calculated within the 5–13 Hz band for children and the 8–13  
257 Hz band for adults using an automated local maxima algorithm (MATLAB function findpeaks).  
258 The lower frequency boundary was used for children in order to account for reduced alpha  
259 peak frequencies in young children when compared to adults (Klimesch, 1999; Bathelt et al.,  
260 2013; Mierau et al., 2016).

### 261 **Parameterising the Power Spectrum with no *a priori* Defined Frequency Bands**

262 The PSDs, calculated by Welch's method, were also submitted to the FOOF v0.1.3  
263 parameterisation model – an open source Python package ([https://github.com/foof-](https://github.com/foof-tools/foof/)  
264 [tools/foof/](https://github.com/foof-tools/foof/); in Python v3.7.0) - for automatic separation of periodic and aperiodic components  
265 of neural power spectra (Haller et al., 2018). Briefly, the model considers the PSDs as a linear  
266 sum of aperiodic “background” neural signal ( $1/f$  signal) and oscillations, or peaks  
267 represented by Gaussian functions in the PSD, above the  $1/f$  signal level.

268 The power spectrum  $P$  is then modelled as:

269 
$$P = L + \sum_{n=0}^N G_n$$

270 with  $L$  the aperiodic “background” signal and  $G$  the oscillations, modelled as  $N$  Gaussians.  
271 The aperiodic signal is fitted, after which the aperiodic fit is subtracted from the power  
272 spectrum, creating a flattened (or aperiodic-adjusted) spectrum, wherein peaks were  
273 iteratively fitted by Gaussians modelled as:

274 
$$G_n = a * \exp\left(\frac{-(F - c)^2}{2w^2}\right)$$

275 where  $a$  is the amplitude,  $c$  is the centre frequency,  $w$  is the bandwidth of the Gaussian  $G$ , and  
276  $F$  is the vector of input frequencies.

277 Subsequently, a peak-removed power spectrum is calculated by subtracting all fitted  
278 Gaussians from the original power spectrum. Finally, an aperiodic signal is re-estimated from  
279 this peak-removed power spectrum, representing the cortical  $1/f$  background signal. Both the  
280 initial and final fit of the aperiodic component are fit as:

281 
$$L = b - \log(k + F^x)$$

282 where  $b$  is the broadband offset,  $x$  is the slope, and  $k$  is the “knee” parameter, which indicates  
283 where the “bend” occurs in the  $1/f$  component. In the current case of non-invasive MEG  
284 recordings, no knee was expected across the frequency range studied (Miller et al., 2009).

285 The FOOOF model was fitted across the frequency range of 1 to 48 Hz in fixed (no spectral  
286 knee) mode (*peak\_width\_limits* = [0.5, 12], *max\_n\_peaks* = 10, *min\_peak\_amplitude* = 0, and  
287 *peak\_threshold* = 2, *aperiodic\_mode* = ‘fixed’). Goodness-of-fit of the FOOOF model is  
288 returned in terms of the  $R^2$  of the fit.

289 Two parameters - the **Slope**  $x$  and the **Offset**  $b$  – defining the aperiodic  $1/f$  background  
290 signal, and three parameters – the **Centre Frequency**  $c$ , **Power**  $a$  and **Bandwidth**  $w$  –

291 characterising the oscillations were returned by the FOOOF parameterisation, and entered  
292 permutation statistical comparisons between the two age groups.

293 In addition, the final aperiodic signal returned from the FOOOF model was subtracted from  
294 the raw power spectrum, resulting in a flattened spectrum from which the absolute alpha and  
295 beta band power was estimated again using the conventional spectral approach.

## 296 **Statistical Analysis**

297 Statistical analyses were performed using permutation testing as implemented in the  
298 Resampling Statistical Toolkit for MATLAB 2017b  
299 (<https://au.mathworks.com/matlabcentral/fileexchange/27960-resampling-statistical-toolkit>).

300 We used 50,000 permutations of group membership to empirically approximate the distribution  
301 for the null hypothesis (i.e., no difference between groups) for each contrast. For each  
302 permutation, t-values were derived for a contrast of interest, and any t-values for the original  
303 contrast that exceeded the significance threshold of 0.05 for the t-distribution were deemed  
304 reliable.

305 In addition, Bayes Factors (alternative BF/null BF; Wagenmakers, 2007; Dienes, 2011) were  
306 estimated in JASP v0.9.2 ( Quintana and Williams, 2018; <https://jasp-stats.org/>) to further  
307 quantify the effect size, and to facilitate the interpretation of evidence for or against the null  
308 hypothesis when comparing to the alternative hypothesis. For the alternative hypotheses of  
309 measures being larger in adults than children and vice versa, a “unit information prior” was  
310 assumed with a default Cauchy prior with a scale parameter of 0.707 (Jeffreys, 1998).  
311 Bayesian correlation analyses, which allows inferences on the absence of a correlation  
312 between variables to be made, were also conducted in JASP. For testing the correlations, a  
313 prespecified alternative hypothesis with a flat beta prior width of 1 centred around  $r = 0$  was  
314 used for a null hypothesis ( $r = 0$ ). An illustration of the effects of assigning a range of different  
315 prior distributions (i.e., a Bayes factor robustness check) was conducted for all Bayesian tests.

316 BFs were thresholded  $> 3$ ,  $> 10$ , and  $>100$  as substantial, strong, and very strong/decisive  
317 evidence in favour of the alternative hypothesis, and  $BF < 1/3$  and  $< 1/10$  for substantial and  
318 strong evidence for the null hypothesis (Raftery, 1995; Jeffreys, 1998). BFs that fell in-between  
319  $1/3$  and  $3$  were taken as insufficient evidence for either hypothesis (Jeffreys, 1998; Dienes,  
320 2014).



## 321 RESULTS

### 322 Raw Power Spectra With *a priori* Defined Frequency Bands

#### 323 Decreases in Low- and Increases in High-Frequency Power

324 Figure 2A&B depicts the results of conventional spectral analyses, absolute power was  
325 computed in five *a priori* defined frequency bands (delta: 1–4 Hz, theta: 4–8 Hz, alpha: 8–13  
326 Hz, beta: 13-30 Hz, and lower gamma: 30–48 Hz). The PSD in Figure 2A shows a tendency  
327 of the grand average power for adults to be lower across lower frequency bands, and higher  
328 in higher bands, compared to children. Permutation statistics identified significantly lower  
329 power in the delta (Figure 2B,  $t(46) = -6$ ,  $p < 0.01$ ) and theta ( $t(46) = -3.78$ ,  $p < 0.01$ ) bands,  
330 and higher power in the beta ( $t(46) = 2.74$ ,  $p < 0.01$ ) and gamma bands ( $t(46) = -2.46$ ,  $p =$   
331  $0.01$ ) in adults compared to children. The right-corner panel in Figure2A shows that the peak  
332 frequency was significantly higher in adults ( $9.99 \pm 1.30$  Hz) than in children ( $7.58 \pm 1.71$  Hz,  
333  $t(46) = 5.5$ ,  $p < 0.01$ ).

334 In addition, the data were examined by estimating a Bayes factor (alternative BF/null BF),  
335 which indicates the fit of the data under the alternative hypothesis. Estimated BFs indicated  
336 decisive evidence for lower PSDs in the delta (BF > 100, 95% Confidence Interval = [-2.30, -  
337 0.93]) and theta (BF = 119.80, 95% CI = [-1.58, -0.41) bands, higher PSDs in the beta (BF =  
338 10.66, 95% CI = [0.16, 1.26]) and gamma (BF = 6.13, 95% CI = [0.10, 1.18]) bands, and higher  
339 peak frequency (BF > 100 95% CI = [0.86, 2.13]) in adults than children. Bayes Factors  
340 suggested that there was strong evidence for the absence of a group difference in alpha band  
341 power (BF = 0.16, 95% CI = [0.01, 0.44]).

## 342 **Parameterised Power Spectra Without *a priori* Defined Frequency Bands**

### 343 **Increase in $1/f$ Slope and Decrease in $1/f$ Offset**

344 Figure 3A shows the aperiodic component of the grand average parameterised spectrum (i.e.,  
345 peaks were removed from the power spectrum) for each age group. The aperiodic power  
346 spectrum was flatter in adults than in children. Permutation testing confirmed that the  
347  $1/f$  slope (Figure 3B) was significantly different (flatter) in adults compared to children (adults  
348 =  $-0.89 \pm -0.12$ ; children =  $-1.15 \pm -0.09$ ,  $t(46) = 8.59$ ,  $p < 0.01$ ), and the  $1/f$  offset was smaller  
349 (adults =  $6.78 \pm 0.15$ ; children =  $7.11 \pm 0.17$ ,  $t(46) = -6.99$ ,  $p < 0.01$ ). Goodness-of-fit, as  
350 indexed by  $R^2$  of the modelling fit was  $0.99 \pm 0.01$  for adults, and  $0.99 \pm 0.01$  for children ( $t(46)$   
351 =  $-1.05$ ,  $p > 0.05$ ), suggesting that a difference in the model fit was not the cause of observed  
352 differences in the  $1/f$  signal between groups.

353 Bayes Factors indicated decisive evidence for flatter/more positive  $1/f$  slope (BF > 100, 95%  
354 CI = [1.66, 3.15]) and lower  $1/f$  offset (BF > 100, 95% CI = [-2.62, -1.20]) in adults compared  
355 to children.

### 356 **Correlation between Age and the Aperiodic $1/f$ Component**

357 Bayes Factors revealed a decisive negative correlation between age and  $1/f$  offset ( $r = -0.71$ ,  
358 BF > 100, 95% CI = [-0.85, -0.39]), and a positive correlation between age and  $1/f$  slope ( $r =$   
359  $0.62$ , BF = 35.88, 95% CI = [0.26, 0.8]) in children. This trend became anecdotal in adults  
360 (offset:  $r = -0.4$ , BF = 1.56, 95% CI = [-0.67, 0.01]; slope:  $r = -0.5$ , BF = 3.7, 95% CI = [0.14,  
361 0.75]).

### 362 **Power and Bandwidth Increase for Beta Power Peaks**

363 Figure 4 shows the group comparisons for the periodic components - **Centre Frequency**,  
364 **Power**, and **Bandwidth** - of the peak oscillation (i.e., the highest power peak across all

365 frequencies in FOOOF model). Figure 4A demonstrates that 95.83% of children and 58.33%  
366 of adults exhibited oscillatory peaks that fall within the alpha range, whereas only 4.17%  
367 children but 41.63% adults had a peak oscillation in the beta band. This suggests that more  
368 adults had oscillatory peaks outside of the canonical 8-13 Hz alpha range. Permutation  
369 comparisons showed that for the peak oscillation the centre frequency was significantly higher  
370 in adults compared to children (Figure 4B; adults =  $13.52 \pm 4.86$ , children =  $10.25 \pm 3.97$ ,  $t(46)$   
371 = 2.55,  $p = 0.01$ ; BF = 7.36, 95% CI = [0.13, 1.21]), and the bandwidth was significantly larger  
372 in adults than in children (Figure 4D; adults =  $3.63 \pm 3.35$ , children =  $1.80 \pm 1.13$ ,  $t(46) = 2.53$ ,  
373  $p = 0.01$ ; BF = 7.07, 95% CI = [0.12, 1.2]).

374 In order to make a valid comparison between parameterised oscillatory components and  
375 canonical narrowband analysis, the centre frequency, power, and bandwidth of the highest  
376 oscillatory component were also extracted independently for the alpha and beta bands from  
377 all individuals (Figure 5A). Figure 5B&E shows Gaussian curves obtained from the individual  
378 oscillatory component values of the FOOOF model for the alpha and beta bands. There is  
379 significant individual variability observable for both bands, which is further quantified in Figures  
380 5C, D, F and G. The aperiodic-adjusted beta peak oscillation (but not alpha) was significantly  
381 higher in power (Figure 5F; adults =  $0.31 \pm 0.11$ , children =  $0.18 \pm 0.09$ ,  $t(46) = 4.37$ ,  $p < 0.01$ ;  
382 BF > 100, 95% CI = [0.51, 1.77]) and larger in bandwidth (Figure 5G; adults =  $4.87 \pm 3.44$ ,  
383 children =  $2.39 \pm 2.58$ ,  $t(46) = 2.83$ ,  $p = 0.01$ ; BF = 13.01, 95% CI = [0.15, 1.29]) in adults  
384 compared to children.

### 385 **Correlation between Age and Peak Oscillatory Components**

386 Bayesian analysis only identified a very strong positive correlation between age and bandwidth  
387 in all participants ( $r(46) = 0.47$ , BF = 43.08, 95% CI = [0.2, 0.65]), but no such evidence for  
388 the individual age groups (adults:  $r = 0.4$ , BF = 1.47, 95% CI = [-0.11, 0.67]; children:  $r(46) =$   
389  $0.26$ , BF = 0.51, 95% CI = [-0.16, 0.57]).

390 In addition, when analysing the periodic components in the beta and alpha bands, Bayes  
391 Factors revealed a very strong positive correlation between age and power in the beta band  
392 in all participants ( $r = 0.5$ ,  $BF = 43.08$ ,  $95\% \text{ CI} = [0.2, 0.65]$ ), but substantial evidence for the  
393 absence of such a correlation in individual age groups (adults:  $r = 0.08$ ,  $BF = 0.27$ ,  $95\% \text{ CI} =$   
394  $[-0.31, 0.44]$ ; children:  $r = 0.07$ ,  $BF = 0.27$ ,  $95\% \text{ CI} = [-0.32, 0.43]$ ).  
395 In children a strong positive correlation was found between age and centre frequency in the  
396 alpha band ( $r = 0.61$ ,  $BF = 27.14$ ,  $95\% \text{ CI} = [0.24, 0.8]$ ).

### 397 **Beta-specific Power Increase in the Flattened Parameterised Power Spectra**

398 Figure 2C&D displays the results of conventional spectral analysis applied to the flattened  
399 PSD, where the aperiodic signal was removed from the power spectrum, thereby leaving only  
400 the oscillatory components. Interestingly, unlike the multiple band-specific power differences  
401 found in the raw power spectra (Figure 2B), the permutation analysis only identified  
402 significantly increased beta power (Figure 2D,  $t(46) = 4.15$ ,  $< 0.01$ ) when comparing adults  
403 and children. The same frequency ranges (children: 5-13 Hz; adults: 8-13 Hz) as for the  
404 conventional analyses were applied when estimating peak frequencies in FOOOF. The right-  
405 corner panel in Figure 2B shows that there was no significant difference in the peak frequency  
406 between adults ( $8.78 \pm 3.58$  Hz) and children ( $9.42 \pm 0.84$  Hz,  $t(46) = -0.85$ ,  $p = 0.4$ ) in the  
407 flattened spectra.

408 Bayes Factors revealed decisive evidence for larger aperiodic-adjusted power in the beta band  
409 ( $BF > 100$ ,  $95\% \text{ CI} = [0.45, 1.72]$ ) in adults compared to children, insufficient evidence for any  
410 group difference in the delta and alpha bands (delta:  $BF = 0.35$ ,  $95\% \text{ CI} = [-0.64, -0.01]$ ; alpha:  
411  $BF = 0.92$ ,  $95\% \text{ CI} = [0.02, 0.85]$ ), and strong evidence for the absent group differences in the  
412 theta and gamma bands (theta:  $BF = 0.17$ ,  $95\% \text{ CI} = [-0.46, -0.006]$ ; gamma:  $BF = 0.28$ ,  $95\%$   
413  $\text{CI} = [0.01, 0.59]$ ). Bayes Factors further suggested substantial evidence for absence of group  
414 difference for alpha peak frequency ( $BF = 0.17$ ,  $95\% \text{ CI} = [0.01, 0.45]$ ).

415 **Positive Correlation between Aperiodic-adjusted Beta Power and Aperiodic  $1/f$**   
416 **Component**

417 Based on the significant group differences in the aperiodic-adjusted power in the beta band  
418 and  $1/f$  signal identified in the parametrised spectra, the presence of correlations between  
419 the beta power in the flattened spectra and the parameters of the  $1/f$  signal was assessed.  
420 Bayes Factors revealed a very strong correlation between the narrowband aperiodic-adjusted  
421 beta power in the flattened spectral and  $1/f$  Slope ( $r = 0.5$ ,  $BF = 94.36$ ,  $95\% CI = [0.24, 0.67]$ ),  
422 and  $1/f$  Offset ( $r = -0.49$ ,  $BF = 66.53$ ,  $95\% CI = [-0.66, -0.22]$ ), across all participants but not  
423 in individual age groups.

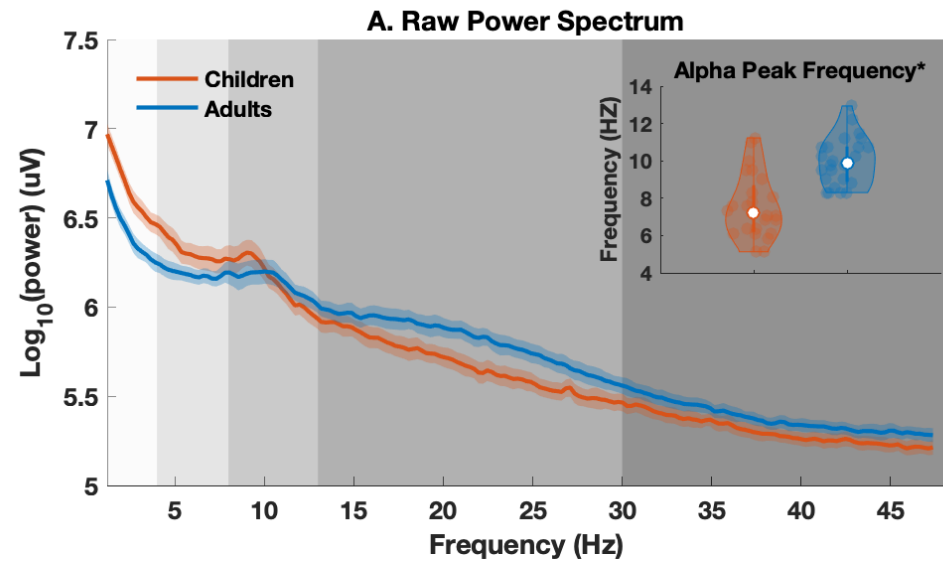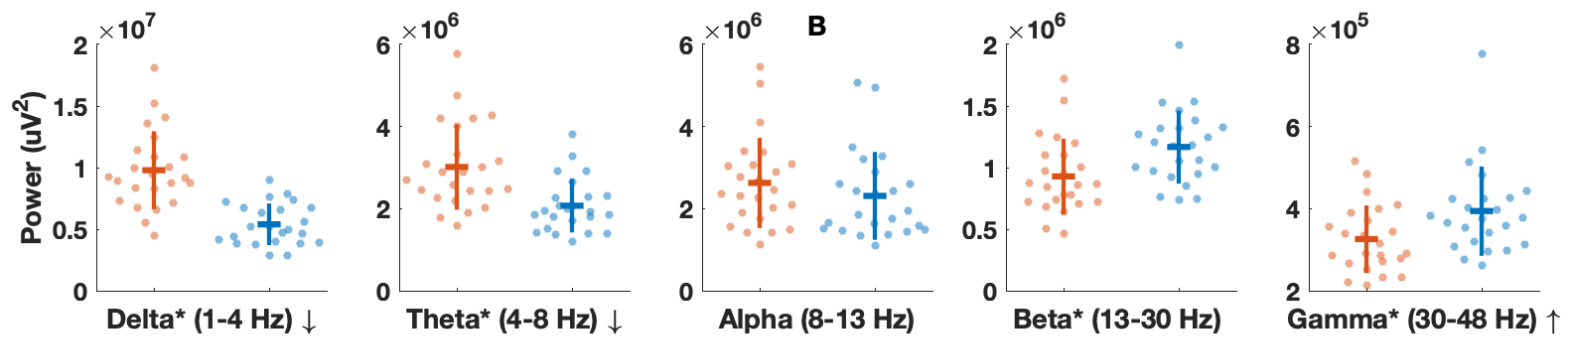

**C. Flattened Power Spectrum (1/f Signal Removed)**

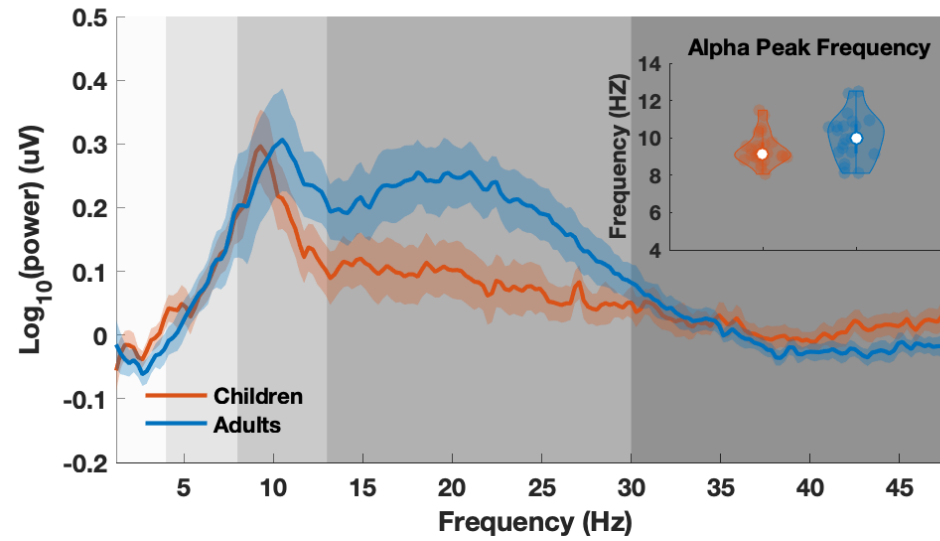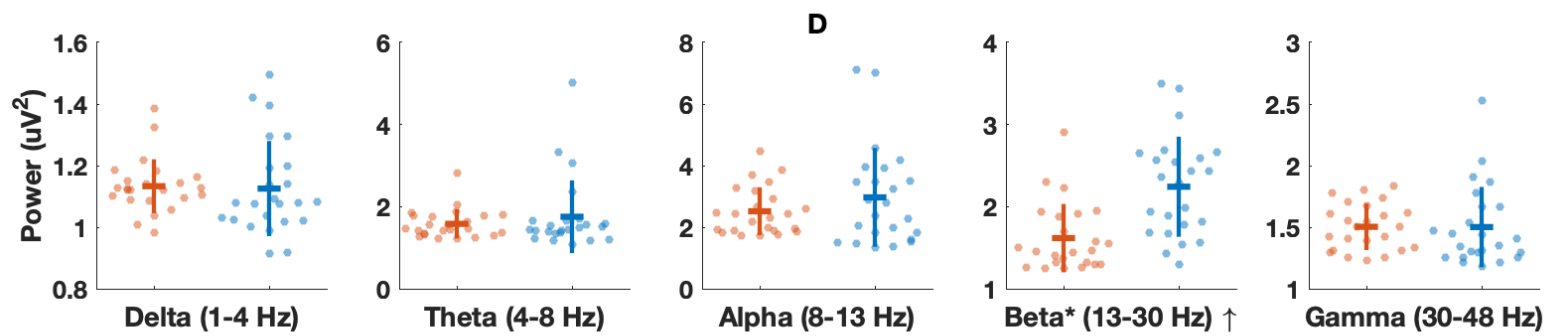

426 **Figure 2. Power Spectral Density for Children (in red, N = 24) and Adults (in blue, N = 24). Grand average of the raw power**  
427 **spectrum (A) and flattened power spectrum (C) for children and adults, with 95% confidence intervals represented by**  
428 **shaded areas (Gaussian-distribution assumed). Violin plots of the peak frequencies identified in the raw power spectra for**  
429 **children (5-13 Hz) and adults (8-13 Hz) are shown in the top-right panels of Figure 2A&C. The white dots depict group mean**  
430 **values. Power (B) and aperiodic-adjusted power (D) in five *a priori* defined canonical frequency bands as colour coded**  
431 **regions with grey gradients. Each dot represents a child participant in red or an adult participant in blue. Horizontal lines**  
432 **indicate group mean and vertical lines standard deviations. \* indicates group difference reaches statistical significance; ↑**  
433 **and ↓ indicate significant increase and significant decrease in power, respectively.**



### A. Reconstructed Aperiodic Power Spectrum

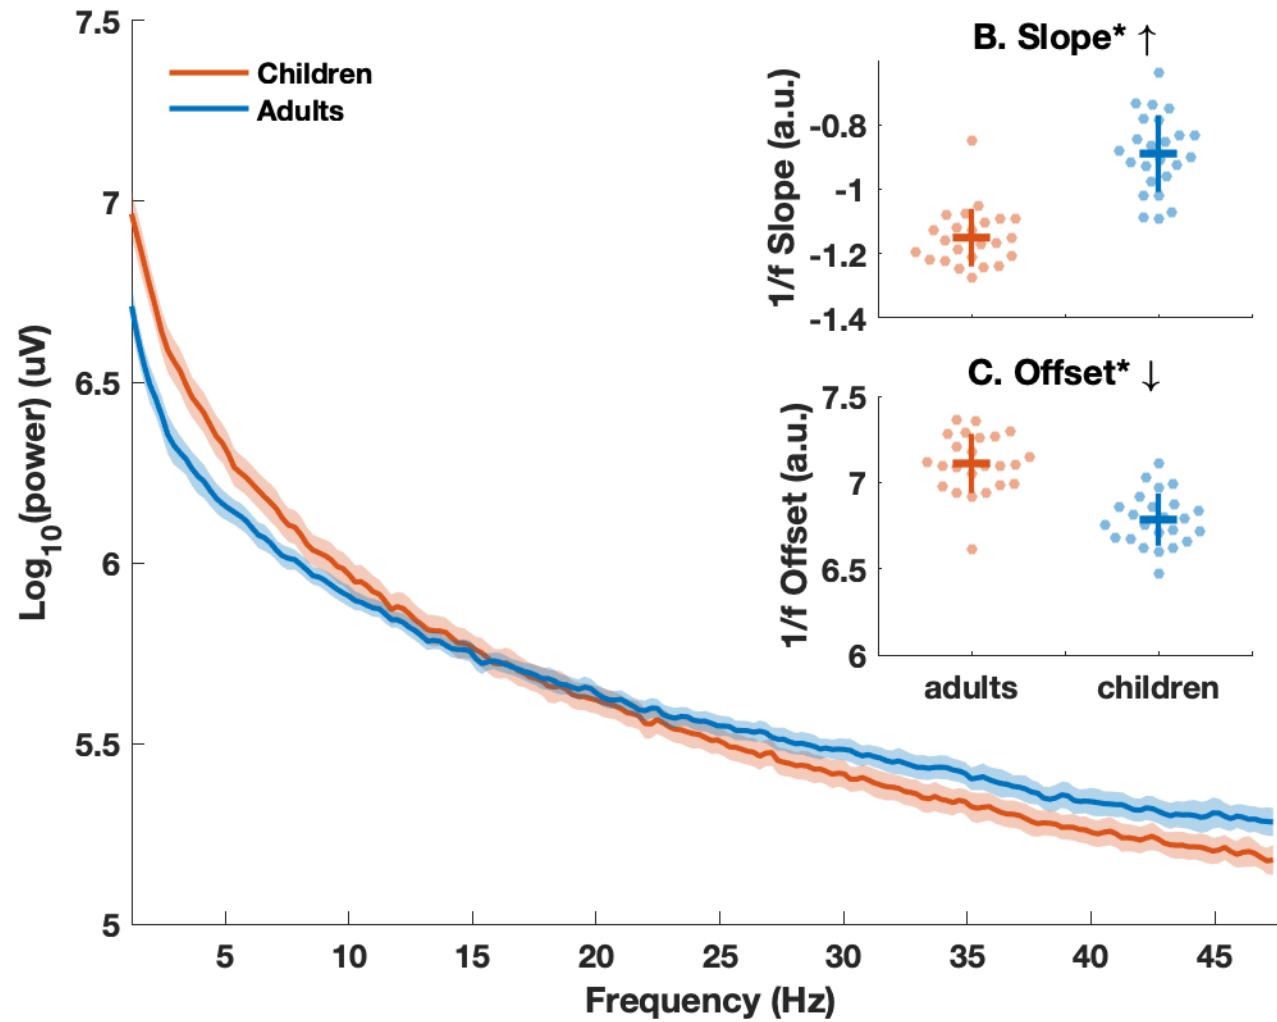

435 **Figure 3. Non-oscillatory Power Spectrum (i.e., oscillatory components have been removed) for Children (in red, N = 24) and**  
436 **Adults (in blue, N = 24). A: Grand average of the log-transformed power spectrum of the aperiodic signal for children and**  
437 **adults, with 95% confidence intervals represented by shaded areas (Gaussian-distribution assumed). B&C: Slope and Offset**  
438 **of the aperiodic power spectrum for both groups. Horizontal lines indicate group mean and vertical lines standard**  
439 **deviations. \* indicates group difference reaches statistical significance; ↑ and ↓ indicate significant increase and significant**  
440 **decrease in power, respectively.**

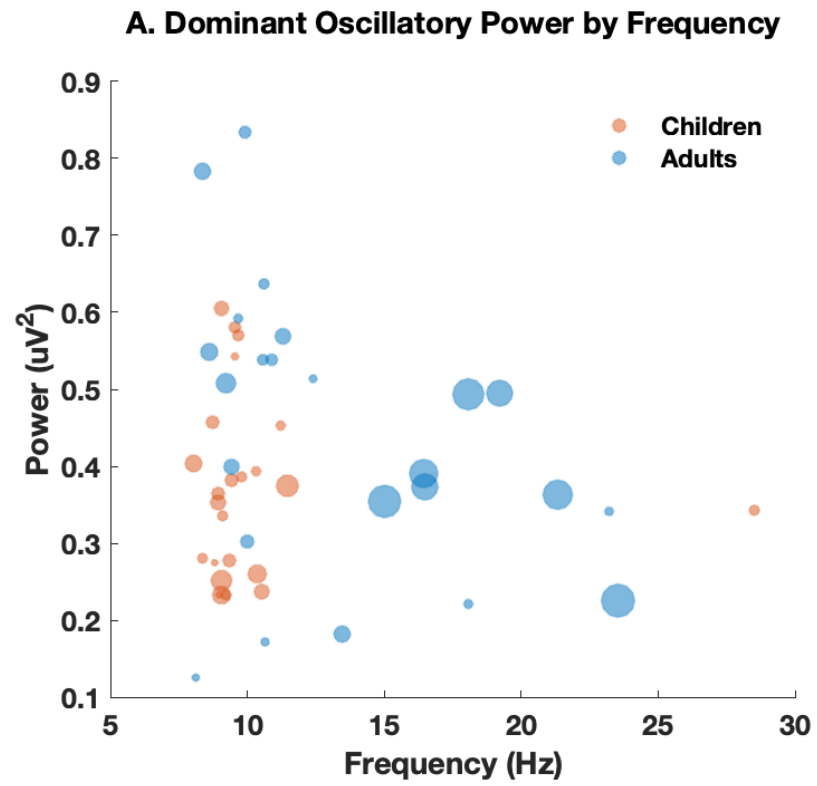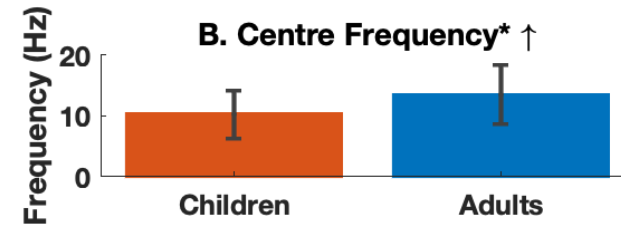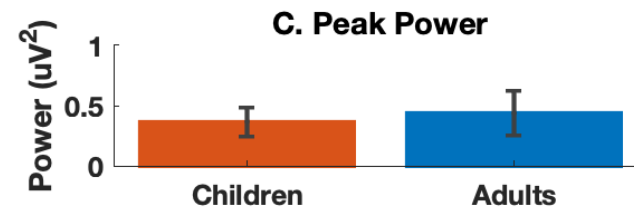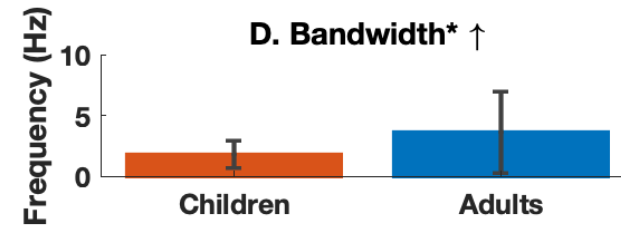

442 **Figure 4. Dominant Oscillations in the Parameterised Power Spectrum for Children (in red, N = 24) and Adults (in blue, N =**  
443 **24). A: The power of the dominant oscillation (i.e., oscillation with the maximum power across the broadband power**  
444 **spectrum) by frequency for each individual, with the size of the circle representing the bandwidth of the dominant oscillation.**  
445 **B-D: Statistical comparisons of the centre frequency, power and the bandwidth of the dominant oscillation. Error bars**  
446 **represent standard error of the group means. \* indicates group difference reaches statistical significance; ↑ and ↓ indicate**  
447 **significant increase and significant decrease in power, respectively.**

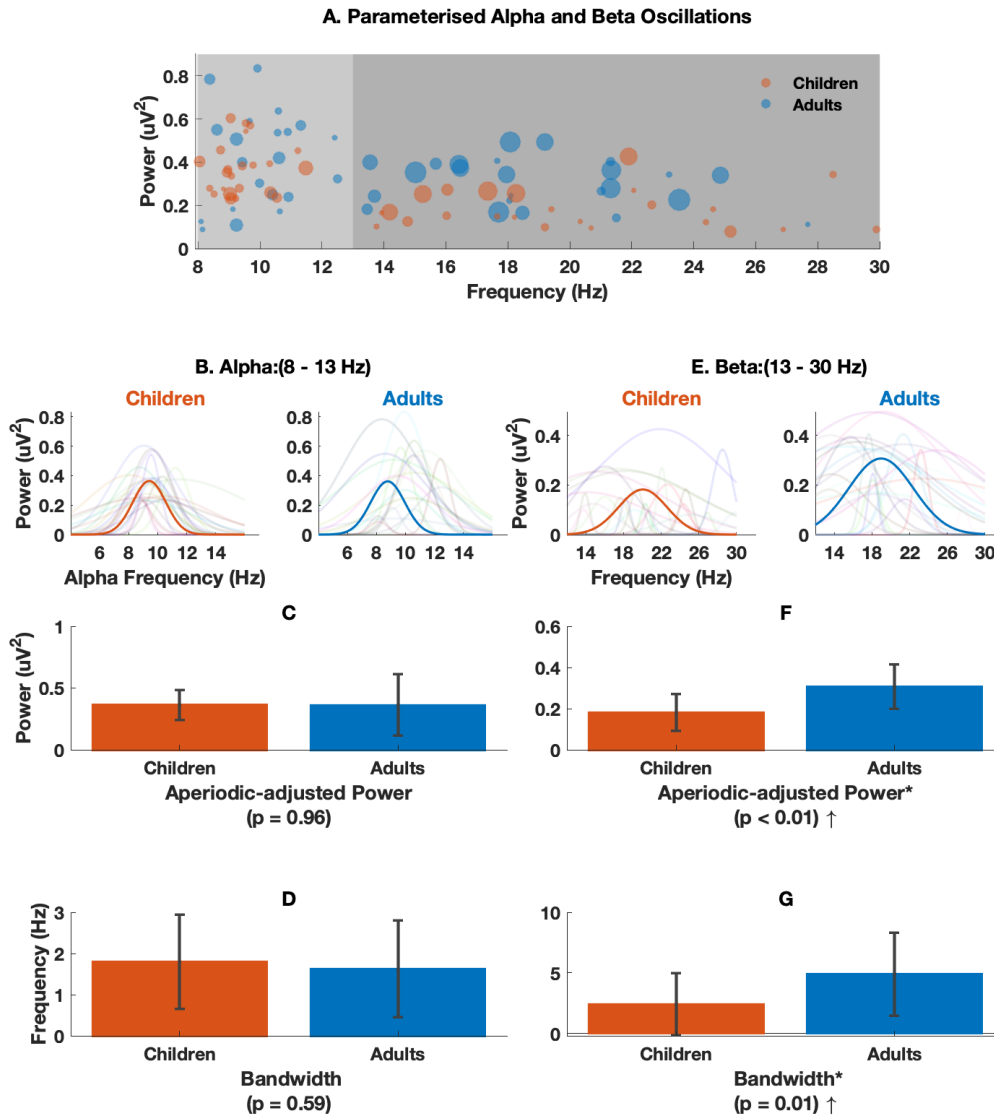

448

449 **Figure 5. Alpha and Beta Band Parameterisation of the Power Spectrum for**

450 **Children (in red, N = 24) and Adults (in blue, N = 24). Two-band models of the**

451 **power spectrum (A) – alpha (red, 8–13 Hz) and beta (blue, 13-30 Hz). B&E show**

452 **the maximum oscillatory power and the frequency at which this occurs for each**

453 **individual. Statistical comparisons of the power (C&F) and the bandwidth (D&G)**

454 **of the oscillations in the alpha and beta bands. Error bars represent standard**

455 **error of the group means. frequency, power and the bandwidth of the peak**

456 **oscillation components. Error bars represent standard error of the group means.**

457 \* indicates group difference reaches statistical significance; ↑ indicates  
458 significant increase in power.

## 459 **DISCUSSION**

460 We investigated developmental changes in the aperiodic  $1/f$  and the oscillatory components  
461 of MEG brain signals. The findings of our conventional analyses of narrowband power and  
462 peak frequency were remarkably similar to previous studies (Marcuse et al., 2008; Boersma  
463 et al., 2011; Cragg et al., 2011; Miskovic et al., 2015; Gomez et al., 2017; Rodriguez-Martinez  
464 et al., 2017). However, these results turned out to be mostly non-significant (except in the beta  
465 band) once the aperiodic  $1/f$  signal and the oscillations were disentangled, and once the  
466 narrowband power was assessed in the flattened power spectrum (that is after  
467 the  $1/f$  component had been removed as shown in Figure 2). In these non-conventional  
468 analyses, we observed distinct (complementary) developmental profiles for the  $1/f$  signal and  
469 oscillatory power, with compelling evidence of flatter  $1/f$  signals and increased beta  
470 oscillations in the adults, as compared to the children. Moreover, the strong correlation  
471 between the  $1/f$  signal and beta oscillatory power suggested a co-maturation of the two  
472 neural phenomena during child development.

### 473 **Conventional versus Parameterised Power Spectral Analyses**

474 Previous developmental studies have shown power decreases in lower frequency bands  
475 (Puligheddu et al., 2005; Gomez et al., 2013; Schafer et al., 2014), and increases in alpha  
476 peak frequency throughout childhood (Marcuse et al., 2008; Boersma et al., 2011; Cragg et  
477 al., 2011; Smit, Boomsma, et al., 2012; Miskovic et al., 2015; Gomez et al., 2017; Rodriguez-  
478 Martinez et al., 2017). By applying conventional methods, we were able to replicate these  
479 findings. However, none of these findings remained significant once careful adjudication  
480 between aperiodic  $1/f$  and oscillatory components was carried out using power spectra  
481 parameterisation (Haller et al., 2018).

482 Interestingly, the peak frequency in the flattened spectra was found to correlate positively with  
483 age in the child participants only, but the peak frequency showed no differences between age

484 groups (Figure 2B), and neither did the aperiodic-adjusted power or frequency bandwidth in  
485 the alpha band (Figure 5C&D). These findings contrast with significant age differences found  
486 in the alpha band when not accounting for the aperiodic  $1/f$  signal, and suggest that the  
487 magnitude of these changes could be heavily conflated by the aperiodic  $1/f$  signal in the raw  
488 power spectrum. This is further supported by the significant correlation that was identified  
489 between the  $1/f$  signal (both offset and slope) and age, only in the child participants. These  
490 findings invite the conclusion that developmentally-related power decreases in lower  
491 frequency bands and peak frequency increases that have been revealed by standard methods  
492 are at least partially driven by the flattening of the  $1/f$  component in the broadband spectrum  
493 (Voytek and Knight, 2015).

#### 494 **Flatter Slope Indicates Increase in Neuronal Noise**

495 The slope of the  $1/f$  signal was found to be flatter, or less negative, in adults than in children.  
496 According to the “Wiener-Khinchin theorem”, the power spectrum is equivalent to the Fourier  
497 transform of the autocovariance function (He, 2014). Therefore, a flatter slope in the frequency  
498 domain indicates a shorter/weaker autocorrelation in the time domain. Interestingly, the  
499 reduction of the autocorrelation in human brain activity has been found to correlate with the  
500 increasing demands for more efficient online information processing during cognitive load in  
501 working memory tasks (He, 2014; Voytek et al., 2015). Indeed, a reduced temporal integration  
502 span in brain activity would be expected to reflect the need for enhanced integration of  
503 information during brain development.

504 There is also evidence that neuronal spiking statistics are relevant to the  $1/f$  slope (Voytek  
505 and Knight, 2015; Gao, 2016), in that the slope of the aggregated local field potential becomes  
506 flatter when a large number of spikes occur asynchronously (Usher et al., 1995; Pozzorini et  
507 al., 2013; Voytek and Knight, 2015). This decoupling of neuronal population spiking from an  
508 oscillatory regime, which has been broadly defined as “noise”, can be driven by increases in  
509 the ratio between local excitation/inhibition (Cremer and Zeef, 1987; McIntosh et al., 2010;



510 Hong and Rebec, 2012; He, 2014; Voytek et al., 2015). In fact, the inhibitory regulation of the  
511 synchronisation between pyramidal neurons from the GABAergic neurons has been found to  
512 undergo prolonged changes into adolescence (Hashimoto et al., 2009).

513 The increase of neuronal noise during brain development has also been reported in studies  
514 adopting a simplistic method that uses the variability of brain signals as a proxy for neuronal  
515 noise. Such efforts have consistently identified increasing variability of both spontaneous and  
516 evoked brain activity to correlate with more stable and accurate behaviour during development  
517 (McIntosh et al., 2010; Fransson et al., 2013). Of direct relevance to our findings, a cross-  
518 sectional EEG study comparing children aged 8-15 years with young adults reported that the  
519 variability of evoked face responses increased with age. This variability turned out to be  
520 positively correlated with intrasubject response accuracy but negatively correlated with  
521 reaction-time variability (McIntosh et al., 2008). This increase in neuronal noise in the  
522 developing brain appeared to be more global, as compared to a more local noise increase  
523 with aging (McIntosh et al., 2010). Speculatively, neuronal noise during childhood shapes the  
524 brain from a deterministic system into one that is more stochastic and adaptive to an uncertain  
525 environment (Knill and Pouget, 2004; Stein et al., 2005). Brain noise in the aging population  
526 continues to increase, but the pattern of changes can be more focal and is often in parallel  
527 with diminished neuroplasticity (Li et al., 2006; Garrett et al., 2010). Such speculation  
528 regarding the network level gains support from our recent analysis of brain network topology  
529 in the same dataset, where pervasive decreases in connectedness were revealed (i.e., nodal  
530 centrality) in most cortical regions, with increasing global network segregation (He et al., 2019).  
531 The same approach, however, has also identified quite focal changes in hub regions as the  
532 driving force of large-scale network abnormalities in various neurological diseases (Stam et  
533 al., 2009; Crossley et al., 2014; DeSalvo et al., 2014; Tewarie et al., 2014; Yu et al., 2017).

## 534 **Smaller Offset Indicates Reduction in Broadband Power**

535 Accumulating evidence suggests that the offset of the  $1/f$  signal reflects the broadband power,  
536 which in turn is associated with the aggregated spiking activity of the underlying neuronal  
537 populations (Manning et al., 2009; Miller et al., 2009; Miller et al., 2014). We found a significant  
538 reduction in the offset of the  $1/f$  signal for adults as compared to children, which could indicate  
539 a reduction in broadband power. Broadband power reductions have been reported  
540 consistently in developmental MEG/EEG studies (Miskovic et al., 2015; Gomez et al., 2017;  
541 Rodriguez-Martinez et al., 2017). This finding also corroborates a previous report on the  
542 developmental parallelism between the reduction in spectral power and cortical thickness  
543 (Whitford et al., 2007). It is understood that brain development begins with neuronal  
544 proliferation and synaptogenesis, followed by synaptic pruning during which synapses are  
545 selectively eliminated (Marsh et al., 2008). Computational work has shown that MEG signals  
546 represent spikes and the envelope of membrane de-/hyper-polarisation, predominantly from  
547 pyramidal neurons (Murakami and Okada, 2006). Therefore, one possible mechanism  
548 underlying the observed offset decreases is “regressive” cortical organisation due to the loss  
549 of grey matter (Giedd et al., 1999; Sowell et al., 2003).

550 We note here that our interpretation of the reduced  $1/f$  offset needs to be taken with caution.  
551 This is because slope and offset of the  $1/f$  signal are highly correlated (Haller et al., 2018),  
552 and thus any change in slope would be accompanied by a change in the offset, regardless of  
553 the offset shifts caused by broadband power reductions. Future studies are needed to clarify  
554 the extent to which the observed offset differences between age groups were caused over  
555 and above those expected from slope shifts.

## 556 **Co-maturing Beta Oscillations during Childhood**

557 Analyses of oscillatory power revealed larger beta power in adults, as compared to children,  
558 and the difference remained significant once the  $1/f$  signal was removed from the broadband

559 power spectrum (Figures 6). The automatic parameterisation algorithm also revealed age-  
560 group differences in both peak oscillatory power and bandwidth in the beta band (Figures 5).  
561 Our findings add to previous developmental evidence for an increase in beta power using  
562 resting-state MEG/EEG (Puligheddu et al., 2005; Gomez et al., 2013; Schafer et al., 2014;  
563 Khan et al., 2018), and concurrent EEG-fMRI (Luchinger et al., 2011). These findings are also  
564 in accord with our recent longitudinal MEG study of motor development in children, which  
565 demonstrated linear increases in amplitude and mean frequency of beta (but not gamma) in  
566 movement (Johnson et al., 2019). Indeed, the beta band has been found to be heavily  
567 engaged in a wide range of processes such as cognitive control (Buschman and Miller, 2014),  
568 which develop well into adolescence (Luna et al., 2015) and changes with aging (Xifra-Porxas  
569 et al., 2019).

570 It is also worth noting that, in contrast to functional resonance imaging (fMRI), the MEG signal  
571 has a more direct relationship with neuronal activity and, compared to EEG signal, is less  
572 contaminated by age-related changes of structures external to the brain, such as the  
573 decreasing electrical conductivity of the human skull with age (Hamalainen et al., 1993;  
574 Hoekema et al., 2003; Baillet, 2017). Therefore, the increased absolute beta power detected  
575 by MEG reinforces the neuronal origin of the maturational power change reported by EEG and  
576 fMRI (Gasser et al., 1988; Marcuse et al., 2008; Boersma et al., 2011; Cragg et al., 2011; Smit,  
577 Boomsma, et al., 2012; Bathelt et al., 2013; Fransson et al., 2013; Miskovic et al., 2015;  
578 Gomez et al., 2017; Rodriguez-Martinez et al., 2017; Vandenbosch et al., 2019). In future work,  
579 we plan to determine if the current findings can be replicated in larger (longitudinal) data sets,  
580 and we will attempt to establish a more fine-tuned cortical representation of the  $1/f$  and  
581 oscillatory signals from power spectra parameterisation. We encourage others to collect or  
582 reanalyse their resting-state data using the techniques we have employed (e.g.,  
583 <https://github.com/foof-tools/foof/>), as well as other open source tools, to help establish  
584 norms of neuronal oscillations and aperiodic signals that are characteristic of healthy brain  
585 development.

## 586 **Limitations**

587 There are some limitations to the present study. First, although our study provides valuable  
588 insights into age-group differences in key measures of neuronal activity, the cross-sectional  
589 nature of the study did not permit us to observe longitudinal changes at an individual level. A  
590 large longitudinal sample with balanced gender would be expected to replicate the current  
591 findings. Second, we assessed age-related differences based on 15 clean trials per participant.  
592 This was done to counteract differences in the number of clean trials between the adult and  
593 child participants. Data from the younger participants were prone to a greater number of  
594 artefacts, such as in-scanner motion. Future study should make use of a more efficient data  
595 acquisition approach (e.g., using calming video clips (Vanderwal et al., 2015)) to obtain larger  
596 data samples with improved quality in young children (Rapaport et al., 2019).

## 597 **Conclusions**

598 By carefully modelling the power spectra of source-space electrophysiological data in adults  
599 and in children aged 4 to 12 years, the present study demonstrated strong evidence of  
600 correlated increases in the  $1/f$  signal and beta power during child brain development. Our  
601 findings suggest that the reported power decreases in low-frequencies and the reported power  
602 increases in high-frequencies (other than the beta band) in many previous studies could have  
603 been caused by a flattening of the  $1/f$  signal, instead of an authentic power change in the  
604 oscillations. In addition, our findings provide empirical support for the theory that neuronal  
605 noise increases with normal brain maturation (McIntosh et al., 2010). This change may shape  
606 the brain into a more stochastic system with balanced neuronal excitation/inhibition, greater  
607 complexity, and greater capacity for information processing (Knill and Pouget, 2004; Stein et  
608 al., 2005). Overall, the findings of the present study suggest that co-increasing beta  
609 oscillations and aperiodic brain signals accompany brain maturation during childhood.

610 **ACKNOWLEDGEMENTS**

611 We thank all participants for their participation. We also thank Douglas Cheyne and Cecilia  
612 Jobst for their assistance in the preliminary data analysis, and Craig Richardson for his  
613 technical support in establishing inter-institutional collaborative data analysis platform. Finally,  
614 we acknowledge the collaboration of Kanazawa Institute of Technology in establishing the  
615 KIT-Macquarie MEG laboratory. This work was supported by the Australian Research Council  
616 (ARC) Centre of Excellence in Cognition and its Disorders (grant number CE110001021,  
617 <http://www.ccd.edu.au>), and the ARC Discovery Project (DP170103148). Wei He was  
618 supported by the Macquarie University Research Fellowship (#9201501199). Paul F. Sowman  
619 was supported by the ARC Discovery Early Career Researcher Award (DE130100868) and  
620 the Australian National Health and Medical Research Council (#1003760).

621 **REFERENCES**

- 622 Amzica F, Steriade M (1998) Electrophysiological correlates of sleep delta waves.  
623 *Electroencephalogr Clin Neurophysiol*, 107:69-83.
- 624 Baillet S (2017) Magnetoencephalography for brain electrophysiology and imaging. *Nat*  
625 *Neurosci*, 20:327-339.
- 626 Bak P, Tang C, Wiesenfeld K (1987) Self-organized criticality: An explanation of the 1/f noise.  
627 *Phys Rev Lett*, 59:381-384.
- 628 Bathelt J, O'Reilly H, Clayden JD, Cross JH, de Haan M (2013) Functional brain network  
629 organisation of children between 2 and 5 years derived from reconstructed activity of  
630 cortical sources of high-density eeg recordings. *Neuroimage*, 82:595-604.
- 631 Benasich AA, Gou Z, Choudhury N, Harris KD (2008) Early cognitive and language skills are  
632 linked to resting frontal gamma power across the first 3 years. *Behav Brain Res*,  
633 195:215-222.
- 634 Berchicci M, Zhang T, Romero L, Peters A, Annett R, Teuscher U, Bertollo M, Okada Y,  
635 Stephen J, Comani S (2011) Development of mu rhythm in infants and preschool  
636 children. *Dev Neurosci*, 33:130-143.
- 637 Boersma M, Smit DJ, de Bie HM, Van Baal GC, Boomsma DI, de Geus EJ, Delemarre-van de  
638 Waal HA, Stam CJ (2011) Network analysis of resting state eeg in the developing  
639 young brain: Structure comes with maturation. *Hum Brain Mapp*, 32:413-425.
- 640 Boord PR, Rennie CJ, Williams LM (2007) Integrating "brain" and "body" measures:  
641 Correlations between eeg and metabolic changes over the human lifespan. *J Integr*  
642 *Neurosci*, 6:205-218.

- 643 Brookes MJ, Vrba J, Robinson SE, Stevenson CM, Peters AM, Barnes GR, Hillebrand A,  
644 Morris PG (2008) Optimising experimental design for meg beamformer imaging.  
645 *Neuroimage*, 39:1788-1802.
- 646 Burianova H, Marstaller L, Sowman P, Tesan G, Rich AN, Williams M, Savage G, Johnson  
647 BW (2013) Multimodal functional imaging of motor imagery using a novel paradigm.  
648 *Neuroimage*, 71:50-58.
- 649 Buschman TJ, Miller EK (2014) Goal-direction and top-down control. *Philos Trans R Soc Lond*  
650 *B Biol Sci*, 369.
- 651 Campbell IG, Feinberg I (2009) Longitudinal trajectories of non-rapid eye movement delta and  
652 theta eeg as indicators of adolescent brain maturation. *Proc Natl Acad Sci U S A*,  
653 106:5177-5180.
- 654 Cheyne D, Bostan AC, Gaetz W, Pang EW (2007) Event-related beamforming: A robust  
655 method for presurgical functional mapping using meg. *Clin Neurophysiol*, 118:1691-  
656 1704.
- 657 Cheyne D, Ferrari P (2013) Meg studies of motor cortex gamma oscillations: Evidence for a  
658 gamma "fingerprint" in the brain? *Front Hum Neurosci*, 7:575.
- 659 Clayton MS, Yeung N, Cohen Kadosh R (2018) The many characters of visual alpha  
660 oscillations. *Eur J Neurosci*, 48:2498-2508.
- 661 Cragg L, Kovacevic N, McIntosh AR, Poulsen C, Martinu K, Leonard G, Paus T (2011)  
662 Maturation of eeg power spectra in early adolescence: A longitudinal study. *Dev Sci*,  
663 14:935-943.
- 664 Cremer R, Zeef EJ (1987) What kind of noise increases with age? *J Gerontol*, 42:515-518.

- 665 Crossley NA, Mechelli A, Scott J, Carletti F, Fox PT, McGuire P, Bullmore ET (2014) The hubs  
666 of the human connectome are generally implicated in the anatomy of brain disorders.  
667 *Brain*, 137:2382-2395.
- 668 DeSalvo MN, Douw L, Tanaka N, Reinsberger C, Stufflebeam SM (2014) Altered structural  
669 connectome in temporal lobe epilepsy. *Radiology*, 270:842-848.
- 670 Dienes Z (2011) Bayesian versus orthodox statistics: Which side are you on? *Perspect*  
671 *Psychol Sci*, 6:274-290.
- 672 Dienes Z (2014) Using bayes to get the most out of non-significant results. *Front Psychol*, 5.
- 673 Etchell AC, Ryan M, Martin E, Johnson BW, Sowman PF (2016) Abnormal time course of low  
674 beta modulation in non-fluent preschool children: A magnetoencephalographic study  
675 of rhythm tracking. *Neuroimage*, 125:953-963.
- 676 Fransson P, Metsaranta M, Blennow M, Aden U, Lagercrantz H, Vanhatalo S (2013) Early  
677 development of spatial patterns of power-law frequency scaling in fmri resting-state  
678 and eeg data in the newborn brain. *Cereb Cortex*, 23:638-646.
- 679 Gaetz W, MacDonald M, Cheyne D, Snead OC (2010) Neuromagnetic imaging of movement-  
680 related cortical oscillations in children and adults: Age predicts post-movement beta  
681 rebound. *Neuroimage*, 51:792-807.
- 682 Gao R (2016) Interpreting the electrophysiological power spectrum. *J Neurophysiol*, 115:628-  
683 630.
- 684 Gao R, Peterson EJ, Voytek B (2017) Inferring synaptic excitation/inhibition balance from field  
685 potentials. *Neuroimage*, 158:70-78.
- 686 Garrett DD, Kovacevic N, McIntosh AR, Grady CL (2010) Blood oxygen level-dependent signal  
687 variability is more than just noise. *Journal of Neuroscience*, 30:4914-4921.



- 688 Gasser T, Verleger R, Bacher P, Sroka L (1988) Development of the eeg of school-age  
689 children and adolescents. I. Analysis of band power. *Electroencephalogr Clin*  
690 *Neurophysiol*, 69:91-99.
- 691 Giedd JN, Blumenthal J, Jeffries NO, Castellanos FX, Liu H, Zijdenbos A, Paus T, Evans AC,  
692 Rapoport JL (1999) Brain development during childhood and adolescence: A  
693 longitudinal mri study. *Nat Neurosci*, 2:861-863.
- 694 Gomez C, Perez-Macias JM, Poza J, Fernandez A, Hornero R (2013) Spectral changes in  
695 spontaneous meg activity across the lifespan. *J Neural Eng*, 10:066006.
- 696 Gomez CM, Rodriguez-Martinez EI, Fernandez A, Maestu F, Poza J, Gomez C (2017)  
697 Absolute power spectral density changes in the magnetoencephalographic activity  
698 during the transition from childhood to adulthood. *Brain Topogr*, 30:87-97.
- 699 Haegens S, Cousijn H, Wallis G, Harrison PJ, Nobre AC (2014) Inter- and intra-individual  
700 variability in alpha peak frequency. *Neuroimage*, 92:46-55.
- 701 Haller M, Donoghue T, Peterson E, Varma P, Sebastian P, Gao R, Noto T, Knight RT,  
702 Shestyuk A, Voytek B (2018) Parameterizing neural power spectra. *bioRxiv*:299859.
- 703 Hamalainen M, Hari R, Ilmoniemi RJ, Knuutila J, Lounasmaa OV (1993)  
704 Magnetoencephalography - theory, instrumentation, and applications to noninvasive  
705 studies of the working human brain. *Rev Mod Phys*, 65:413-497.
- 706 Hashimoto T, Nguyen QL, Rotaru D, Keenan T, Arion D, Beneyto M, Gonzalez-Burgos G,  
707 Lewis DA (2009) Protracted developmental trajectories of gabaa receptor alpha1 and  
708 alpha2 subunit expression in primate prefrontal cortex. *Biol Psychiatry*, 65:1015-1023.
- 709 He BJ (2014) Scale-free brain activity: Past, present, and future. *Trends Cogn Sci*, 18:480-  
710 487.

- 711 He BJ, Zempel JM, Snyder AZ, Raichle ME (2010) The temporal structures and functional  
712 significance of scale-free brain activity. *Neuron*, 66:353-369.
- 713 He W, Brock J, Johnson BW (2015) Face processing in the brains of pre-school aged children  
714 measured with meg. *Neuroimage*, 106:317-327.
- 715 He W, Garrido MI, Sowman PF, Brock J, Johnson BW (2015) Development of effective  
716 connectivity in the core network for face perception. *Hum Brain Mapp*, 36:2161-2173.
- 717 He W, Sowman PF, Brock J, Etchell AC, Stam CJ, Hillebrand A (2019) Increased segregation  
718 of functional networks in developing brains. *NeuroImage*, 200:607-620.
- 719 Heinrichs-Graham E, McDermott TJ, Mills MS, Wiesman AI, Wang YP, Stephen JM, Calhoun  
720 VD, Wilson TW (2018) The lifespan trajectory of neural oscillatory activity in the motor  
721 system. *Dev Cogn Neurosci*, 30:159-168.
- 722 Hillebrand A, Barnes GR, Bosboom JL, Berendse HW, Stam CJ (2012) Frequency-dependent  
723 functional connectivity within resting-state networks: An atlas-based meg beamformer  
724 solution. *Neuroimage*, 59:3909-3921.
- 725 Hillebrand A, Tewarie P, van Dellen E, Yu M, Carbo EW, Douw L, Gouw AA, van Straaten EC,  
726 Stam CJ (2016) Direction of information flow in large-scale resting-state networks is  
727 frequency-dependent. *Proc Natl Acad Sci U S A*, 113:3867-3872.
- 728 Hoekema R, Wieneke GH, Leijten FS, van Veelen CW, van Rijen PC, Huiskamp GJ, Ansems  
729 J, van Huffelen AC (2003) Measurement of the conductivity of skull, temporarily  
730 removed during epilepsy surgery. *Brain Topogr*, 16:29-38.
- 731 Hong SL, Rebec GV (2012) A new perspective on behavioral inconsistency and neural noise  
732 in aging: Compensatory speeding of neural communication. *Front Aging Neurosci*,  
733 4:27.

- 734 Irimia A, Erhart MJ, Brown TT (2014) Variability of magnetoencephalographic sensor  
735 sensitivity measures as a function of age, brain volume and cortical area. *Clin*  
736 *Neurophysiol*, 125:1973-1984.
- 737 Jeffreys H (1998) The theory of probability. Oxford: OUP.
- 738 Jenkinson N, Brown P (2011) New insights into the relationship between dopamine, beta  
739 oscillations and motor function. *Trends Neurosci*, 34:611-618.
- 740 Jensen O, Mazaheri A (2010) Shaping functional architecture by oscillatory alpha activity:  
741 Gating by inhibition. *Front Hum Neurosci*, 4.
- 742 Johnson B, Jobst C, Al-Loos R, He W, Cheyne D (2019) Developmental changes in movement  
743 related brain activity in early childhood. . *bioRxiv*, :531905.
- 744 Johnson BW, Crain S, Thornton R, Tesan G, Reid M (2010) Measurement of brain function in  
745 pre-school children using a custom sized whole-head meg sensor array. *Clin*  
746 *Neurophysiol*, 121:340-349.
- 747 Kado H, Higuchi M, Shimogawara M, Haruta Y, Adachi Y, Kawai J, Ogata H, Uehara G (1999)  
748 Magnetoencephalogram systems developed at kit. *IEEE Trans Appl Supercond*,  
749 9:4057-4062.
- 750 Khan S, Hashmi JA, Mamashli F, Michmizos K, Kitzbichler MG, Bharadwaj H, Bekhti Y,  
751 Ganesan S, Garell KA, Whitfield-Gabrieli S, Gollub RL, Kong J, Vaina LM, Rana KD,  
752 Stufflebeam SM, Hamalainen MS, Kenet T (2018) Maturation trajectories of cortical  
753 resting-state networks depend on the mediating frequency band. *Neuroimage*, 174:57-  
754 68.
- 755 Klimesch W (1999) Eeg alpha and theta oscillations reflect cognitive and memory performance:  
756 A review and analysis. *Brain Res Rev*, 29:169-195.

- 757 Knill DC, Pouget A (2004) The bayesian brain: The role of uncertainty in neural coding and  
758 computation. *Trends in Neurosci*, 27:712-719.
- 759 Li SC, Brehmer Y, Shing YL, Werkle-Bergner M, Lindenberger U (2006) Neuromodulation of  
760 associative and organizational plasticity across the life span: Empirical evidence and  
761 neurocomputational modeling. *Neurosci Biobehav Rev*, 30:775-790.
- 762 Luchinger R, Michels L, Martin E, Brandeis D (2011) Eeg-bold correlations during  
763 (post-)adolescent brain maturation. *Neuroimage*, 56:1493-1505.
- 764 Luna B, Marek S, Larsen B, Tervo-Clemmens B, Chahal R (2015) An integrative model of the  
765 maturation of cognitive control. *Annu Rev Neurosci*, 38:151-170.
- 766 Mackay WA (1997) Synchronized neuronal oscillations and their role in motor processes.  
767 *Trends Cogn Sci*, 1:176-183.
- 768 Manning JR, Jacobs J, Fried I, Kahana MJ (2009) Broadband shifts in local field potential  
769 power spectra are correlated with single-neuron spiking in humans. *J Neurosci*,  
770 29:13613-13620.
- 771 Marcuse LV, Schneider M, Mortati KA, Donnelly KM, Arnedo V, Grant AC (2008) Quantitative  
772 analysis of the eeg posterior-dominant rhythm in healthy adolescents. *Clin*  
773 *Neurophysiol*, 119:1778-1781.
- 774 Markand ON (1990) Alpha rhythms. *J Clin Neurophysiol*, 7:163-189.
- 775 Marsh R, Gerber AJ, Peterson BS (2008) Neuroimaging studies of normal brain development  
776 and their relevance for understanding childhood neuropsychiatric disorders. *J Am*  
777 *Acad Child Adolesc Psychiatry*, 47:1233-1251.
- 778 Marstaller L, Burianova H, Sowman PF (2014) High gamma oscillations in medial temporal  
779 lobe during overt production of speech and gestures. *PLoS One*, 9:e111473.

- 780 McIntosh AR, Kovacevic N, Itier RJ (2008) Increased brain signal variability accompanies  
781 lower behavioral variability in development. *PLoS Comput Biol*, 4.
- 782 McIntosh AR, Kovacevic N, Lippe S, Garrett D, Grady C, Jirsa V (2010) The development of  
783 a noisy brain. *Archives Italiennes De Biologie*, 148:323-337.
- 784 Mierau A, Felsch M, Hulsdunker T, Mierau J, Bullermann P, Weiss B, Struder HK (2016) The  
785 interrelation between sensorimotor abilities, cognitive performance and individual eeg  
786 alpha peak frequency in young children. *Clin Neurophysiol*, 127:270-276.
- 787 Miller KJ, Honey CJ, Hermes D, Rao RP, denNijs M, Ojemann JG (2014) Broadband changes  
788 in the cortical surface potential track activation of functionally diverse neuronal  
789 populations. *Neuroimage*, 85 Pt 2:711-720.
- 790 Miller KJ, Sorensen LB, Ojemann JG, den Nijs M (2009) Power-law scaling in the brain surface  
791 electric potential. *PLoS Comput Biol*, 5:e1000609.
- 792 Miskovic V, Ma X, Chou CA, Fan M, Owens M, Sayama H, Gibb BE (2015) Developmental  
793 changes in spontaneous electrocortical activity and network organization from early to  
794 late childhood. *Neuroimage*, 118:237-247.
- 795 Murakami S, Okada Y (2006) Contributions of principal neocortical neurons to  
796 magnetoencephalography and electroencephalography signals. *J Physiol*, 575:925-  
797 936.
- 798 Podvalny E, Noy N, Harel M, Bickel S, Chechik G, Schroeder CE, Mehta AD, Tsodyks M,  
799 Malach R (2015) A unifying principle underlying the extracellular field potential spectral  
800 responses in the human cortex. *J Neurophysiol*, 114:505-519.
- 801 Pozzorini C, Naud R, Mensi S, Gerstner W (2013) Temporal whitening by power-law  
802 adaptation in neocortical neurons. *Nat Neurosci*, 16:942-U216.

- 803 Puligheddu M, de Munck JC, Stam CJ, Verbunt J, de Jongh A, van Dijk BW, Marrosu F (2005)  
804 Age distribution of meg spontaneous theta activity in healthy subjects. *Brain Topogr*,  
805 17:165-175.
- 806 Quintana DS, Williams DR (2018) Bayesian alternatives for common null-hypothesis  
807 significance tests in psychiatry: A non-technical guide using jasp. *BMC Psychiatry*, 18.
- 808 Raftery AE (1995) Bayesian model selection in social research. *Sociol Methodol*, 25:111-163.
- 809 Rapaport H, Seymour RA, Sowman PF, Benikos N, Stylianou E, Johnson B, Crain S, He W  
810 (2019) Studying brain function in children using magnetoencephalography. *JOVE*, 146.
- 811 Ritter P, Moosmann M, Villringer A (2009) Rolandic alpha and beta eeg rhythms' strengths  
812 are inversely related to fmri-bold signal in primary somatosensory and motor cortex.  
813 *Hum Brain Mapp*, 30:1168-1187.
- 814 Robinson SE (1999) Functional neuroimaging by synthetic aperture magnetometry (sam).  
815 *Recent Adv Biomagnetism*:302-305.
- 816 Rodriguez-Martinez EI, Ruiz-Martinez FJ, Barriga Paulino CI, Gomez CM (2017) Frequency  
817 shift in topography of spontaneous brain rhythms from childhood to adulthood. *Cogn*  
818 *Neurodyn*, 11:23-33.
- 819 Samaha J, Postle BR (2015) The speed of alpha-band oscillations predicts the temporal  
820 resolution of visual perception. *Curr Biol*, 25:2985-2990.
- 821 Schafer CB, Morgan BR, Ye AX, Taylor MJ, Doesburg SM (2014) Oscillations, networks, and  
822 their development: Meg connectivity changes with age. *Hum Brain Mapp*, 35:5249-  
823 5261.

- 824 Smit DJ, Boomsma DI, Schnack HG, Hulshoff Pol HE, de Geus EJ (2012) Individual  
825 differences in eeg spectral power reflect genetic variance in gray and white matter  
826 volumes. *Twin Res Hum Genet*, 15:384-392.
- 827 Smit DJ, Boersma M, Schnack HG, Micheloyannis S, Boomsma DI, Pol HEH, Stam CJ, de  
828 Geus EJC (2012) The brain matures with stronger functional connectivity and  
829 decreased randomness of its network. *Plos One*, 7.
- 830 Sowell ER, Peterson BS, Thompson PM, Welcome SE, Henkenius AL, Toga AW (2003)  
831 Mapping cortical change across the human life span. *Nat Neurosci*, 6:309-315.
- 832 Sowman PF, Dueholm SS, Rasmussen JH, Mrachacz-Kersting N (2014) Induction of plasticity  
833 in the human motor cortex by pairing an auditory stimulus with tms. *Front Hum*  
834 *Neurosci*, 8:398.
- 835 Stam CJ, de Haan W, Daffertshofer A, Jones BF, Manshanden I, van Cappellen van Walsum  
836 AM, Montez T, Verbunt JP, de Munck JC, van Dijk BW, Berendse HW, Scheltens P  
837 (2009) Graph theoretical analysis of magnetoencephalographic functional connectivity  
838 in alzheimer's disease. *Brain*, 132:213-224.
- 839 Stein RB, Gossen ER, Jones KE (2005) Neuronal variability: Noise or part of the signal? *Nat*  
840 *Rev Neurosci*, 6:389-397.
- 841 Tewarie P, Hillebrand A, Schoonheim MM, van Dijk BW, Geurts JJG, Barkhof F, Polman CH,  
842 Stam CJ (2014) Functional brain network analysis using minimum spanning trees in  
843 multiple sclerosis: An meg source-space study. *NeuroImage*, 88:308-318.
- 844 Thut G, Miniussi C, Gross J (2012) The functional importance of rhythmic activity in the brain.  
845 *Curr Biol*, 22:R658-663.

- 846 Tzourio-Mazoyer N, Landeau B, Papathanassiou D, Crivello F, Etard O, Delcroix N, Mazoyer  
847 B, Joliot M (2002) Automated anatomical labeling of activations in spm using a  
848 macroscopic anatomical parcellation of the mni mri single-subject brain. *Neuroimage*,  
849 15:273-289.
- 850 Usher M, Stemmler M, Olami Z (1995) Dynamic pattern formation leads to 1/f noise in neural  
851 populations. *Phys Rev Lett*, 74:326-329.
- 852 Valdés P, Biscay R, Galán L, Bosch J, Szava S, Virués T (1990) High resolution spectral eeg  
853 norms for topography. *Brain Topogr*, 3:281-282.
- 854 Vandenbosch MMLJZ, van t'Ent D, Boomsma DI, Anokhin AP, Smit DJA (2019) Eeg-based  
855 age-prediction models as stable and heritable indicators of brain maturational level in  
856 children and adolescents. *Hum Brain Mapp*, 40:1919-1926.
- 857 Vanderwal T, Kelly C, Eilbott J, Mayes LC, Castellanos FX (2015) Inscapes: A movie paradigm  
858 to improve compliance in functional magnetic resonance imaging. *Neuroimage*,  
859 122:222-232.
- 860 Voytek B, Knight RT (2015) Dynamic network communication as a unifying neural basis for  
861 cognition, development, aging, and disease. *Biol Psychiatry*, 77:1089-1097.
- 862 Voytek B, Kramer MA, Case J, Lepage KQ, Tempesta ZR, Knight RT, Gazzaley A (2015) Age-  
863 related changes in 1/f neural electrophysiological noise. *J Neurosci*, 35:13257-13265.
- 864 Voytek B, Samaha J, Rolle CE, Greenberg Z, Gill N, Porat S, Kader T, Rahman S, Malzyner  
865 R, Gazzaley A (2017) Preparatory encoding of the fine scale of human spatial attention.  
866 *J Cogn Neurosci*, 29:1302-1310.
- 867 Wagenmakers EJ (2007) A practical solution to the pervasive problems of p values. *Psychon*  
868 *Bull Rev*, 14:779-804.



- 869 Wang C, Ulbert I, Schomer DL, Marinkovic K, Halgren E (2005) Responses of human anterior  
870 cingulate cortex microdomains to error detection, conflict monitoring, stimulus-  
871 response mapping, familiarity, and orienting. *J Neurosci*, 25:604-613.
- 872 Welch P (1967) The use of fast fourier transform for the estimation of power spectra: A method  
873 based on time averaging over short, modified periodograms. *IEEE Trans Acoust*,  
874 15:70-73.
- 875 Whitford TJ, Rennie CJ, Grieve SM, Clark CR, Gordon E, Williams LM (2007) Brain maturation  
876 in adolescence: Concurrent changes in neuroanatomy and neurophysiology. *Hum*  
877 *Brain Mapp*, 28:228-237.
- 878 Xifra-Porxas A, Niso G, Lariviere S, Kassinopoulos M, Baillet S, Mitsis GD, Boudrias MH (2019)  
879 Older adults exhibit a more pronounced modulation of beta oscillations when  
880 performing sustained and dynamic handgrips. *Neuroimage*, 201:116037.
- 881 Yu M, Engels MMA, Hillebrand A, van Straaten ECW, Gouw AA, Teunissen C, van der Flier  
882 WM, Scheltens P, Stam CJ (2017) Selective impairment of hippocampus and posterior  
883 hub areas in alzheimer's disease: An meg-based multiplex network study. *Brain*,  
884 140:1466-1485.
